1 **Enhancers facilitate the birth of *de novo* genes and their functional integration into regulatory**  
2 **networks**

3 Paco Majic<sup>1,2</sup> & Joshua L. Payne<sup>1,2,\*</sup>

4 1. Institute of Integrative Biology, ETH Zurich, Switzerland

5 2. Swiss Institute of Bioinformatics, Lausanne, Switzerland

6 \* Correspondence to: [joshua.payne@env.ethz.ch](mailto:joshua.payne@env.ethz.ch)

7 **Abstract**

8 Regulatory networks control the spatiotemporal gene expression patterns that give rise to and define the  
9 individual cell types of multicellular organisms. In Eumetazoa, distal regulatory elements called enhancers  
10 play a key role in determining the structure of such networks, particularly the wiring diagram of “who  
11 regulates whom.” Mutations that affect enhancer activity can therefore rewire regulatory networks,  
12 potentially causing changes in gene expression that may be adaptive. Here, we use single-cell  
13 transcriptomic and chromatin accessibility data from mouse to show that enhancers play an additional role  
14 in the evolution of regulatory networks: They facilitate network growth by creating transcriptionally active  
15 regions of open chromatin that are conducive to *de novo* gene evolution. Specifically, our comparative  
16 transcriptomic analysis with three other mammalian species shows that young, mouse-specific transcribed  
17 open reading frames are preferentially located near enhancers, whereas older open reading frames are not.  
18 Interactions with enhancers are then gained incrementally over macro-evolutionary timescales, helping  
19 integrate new genes into existing regulatory networks. Taken together, our results highlight a dual role of  
20 enhancers in expanding and rewiring gene regulatory networks.

## 21        **Introduction**

22        Enhancers are a defining characteristic of eumetazoan gene regulatory networks. They recruit  
23 transcription factors and cofactors that “loop out” DNA to bind core promoters and increase the expression  
24 of target genes [1, 2], thus mediating interactions between genes. Such interactions are highly dynamic  
25 throughout development, facilitating the differential deployment of distinct regulatory sub-networks in  
26 different cells, which helps define cell-type specific spatiotemporal gene expression patterns [3, 4].

27        Enhancer activity is not only dynamic throughout development, but also throughout evolutionary time  
28 [5]. The reason is that mutations in enhancer sequences can create or ablate interactions with regulatory  
29 proteins, thus enabling modifications in gene use without affecting gene product [6, 7]. Such changes alter  
30 a regulatory network’s wiring diagram of “who regulates whom,” which can cause changes in gene  
31 expression patterns that embody or lead to evolutionary adaptations or innovations [8]. Examples include  
32 the archetypical pentadactyl limb anatomy of extant tetrapods [9], ocular regression in subterranean  
33 rodents [10, 11], limb loss in snakes [11, 12], convergent pigmentation patterns in East African cichlids  
34 [13], the mammalian neocortex [14], and cell type diversity in eumetazoans [15].

35        Regulatory networks not only evolve via rewiring, but also via the addition of new genes [16]. Gene  
36 duplication, retrotransposition, gene fusion, the domestication of genomic parasites, and horizontal gene  
37 transfer are all means by which new genes can arise from pre-existing genes [17], and thus expand gene  
38 regulatory networks. In addition, it is becoming increasingly appreciated that new genes can arise *de novo*  
39 from non-coding regions of the genome [18-22]. For protein-coding genes, the essential prerequisites of  
40 this process are the formation of an open reading frame (ORF), together with the transcription and  
41 translation of that ORF. Because much of the genome is transcribed [23, 24] and many lineage-specific  
42 transcripts containing ORFs are potentially translated [25-30], the *de novo* evolution of new protein-coding  
43 genes is also a likely contributor to the growth of gene regulatory networks.

44        An important question concerning *de novo* genes is how they integrate into existing regulatory  
45 networks, and what role enhancers may play in this process. It has been hypothesized that enhancer  
46 acquisition allows new genes to expand their breadth of expression, providing opportunities to acquire new  
47 functions in different cellular contexts [31]. Enhancers may therefore help new genes integrate into  
48 existing regulatory networks via edge formation and rewiring. Less appreciated is the role enhancers may

49 play in the origin of *de novo* genes [32], and thus in the growth of gene regulatory networks. The physical  
50 proximity between active enhancers and their target genes [33] – facilitated by DNA looping – creates a  
51 transcriptionally permissive environment that is engaged with RNA polymerase II, which may lead to the  
52 transcription of regions near the enhancer, or to the transcription of the enhancer itself, producing so-called  
53 enhancer RNA [1, 34]. If the resulting transcript is stable, harbors an open reading frame, and engages  
54 with ribosomes, then it fulfills the basic prerequisites of *de novo* gene birth. Thus, enhancers may play a  
55 dual role in the evolution of *de novo* genes, and consequently in the evolution of gene regulatory networks.  
56 By creating a transcriptionally permissive environment that is engaged with the transcriptional machinery,  
57 enhancers may facilitate the origin of *de novo* genes; by physically interacting with gene promoters,  
58 enhancers may facilitate the integration of *de novo* genes into existing regulatory networks.

59 Here, we take an integrative approach to study this potential dual role of enhancers. We leverage  
60 single-cell transcriptomic and functional genomics data from mouse that describe gene expression levels,  
61 chromatin accessibility, and chemical modifications to histones, as well as phylostratigraphic estimates of  
62 the ages of transcribed ORFs. We find that the distance between ORFs and enhancers in nucleotide  
63 sequence increases with ORF age, indicating that young ORFs preferentially emerge near enhancers. We  
64 also find that the number of enhancer interactions per ORF increases with ORF age, even across macro-  
65 evolutionary timescales. In sum, our findings support a dual role for enhancers in the origin of *de novo*  
66 genes and in their functional integration into gene regulatory networks.

67

## 68 **Results**

### 69 *The maturity and age of transcribed open reading frames*

70 To set the stage for our study, we first characterized the maturity and age of a set of mouse  
71 transcripts bearing ORFs [29]. Specifically, we characterized the transcript maturity of 46,501 murine  
72 ORFs by assessing whether *i*) the ORF resides in a region of open chromatin, which implies it is accessible  
73 to the transcriptional machinery; *ii*) the transcript has detectable 5' capping, which confers stability [35,  
74 36], permits its export from the nucleus to the cytoplasm [37] and promotes translation [36]; and *iii*) the  
75 transcript associates with ribosomes, indicating the potential for translation [25, 29, 30]. Fig. 1A shows a  
76 schematic of our classification of transcript maturity.

77 We found that over a third (16,735) of the 46,501 ORFs had the highest level of transcript maturity,  
78 which we refer to as maturity level 3 (Fig. 1B). The remaining ORFs were distributed among different  
79 combinations of the three maturity indicators. We refer to ORFs found in regions of open chromatin as  
80 having a maturity level 1 (5,640 ORFs) and those that are also 5' capped as having a maturity level 2  
81 (4,927 ORFs).

82 The ORFs we assessed had their phylogenetic age estimated by Schmitz et al. [29], based on their  
83 presence in the transcriptomes of other mammalian species, including rat, human, and opossum (Fig. 2A).  
84 If a homolog of a mouse ORF is found in another species, then it is assumed to have emerged before the  
85 common ancestor of that species and mouse. For example, if an ORF is shared with opossum, it is assumed  
86 to have originated before the branching of marsupials and placental mammals ~160 million years ago; if it  
87 is not shared with any of the other three species, it is assumed to have emerged only after the split between  
88 mouse and rat ~20 million years ago. Expectedly, when assessing the distribution of ORFs with each of the  
89 maturity indicators across the different age categories, we found that the older an ORF is, the more likely it  
90 is to correspond to higher levels of maturity. This is clear from the observation that the percentage of  
91 ORFs corresponding to the oldest age class (i.e., opossum) increases with the maturity level, while the  
92 percentage corresponding to the youngest age class (i.e., mouse) decreases (Fig. 2B). Furthermore,  
93 whereas most mouse-specific ORFs have a maturity level of 1, that fraction gradually decreases as ORFs  
94 grow older, while the fraction of ORFs of maturity level 3 increases with age from their minimum in  
95 mouse-specific ORFs to their maximum in opossum-shared ORFs (Fig. 2C).

96 Due to the resolution of the phylogeny shown in Fig. 2A, there is variation in the ages of the ORFs  
97 even within a given lineage. We therefore reasoned that such variation might be reflected by variation in  
98 transcript maturity. To determine if this was the case, we considered the expression of mouse-specific  
99 ORFs from ten different taxa from the mouse branch after the mouse-rat split (Fig. 2D) [23]. Making use  
100 of transcriptomic data from those ten taxa, we determined when in the recent phylogenetic history leading  
101 to our focal species (*Mus musculus domesticus*) did the genomic regions harboring mouse-specific ORFs  
102 start being transcribed. As anticipated, we found that whereas the fraction of non-mouse-specific ORFs  
103 with detectable transcription is relatively constant across the different lineages, fewer mouse-specific  
104 ORFs are expressed in the lineages that are more distantly related to *M. m. domesticus* (Fig. 2E). We also  
105 observed that more mature ORFs are more likely to be transcribed at more basal branches of the mouse

106 phylogeny than are less mature ORFs, indicating that transcript maturity is indicative of when in the mouse  
107 phylogeny the genomic region harboring the ORF started being transcribed (Fig. 2F).

108 In sum, these results show that an ORF's transcript maturity increases with its age, complementing  
109 previous reports that focused on the correlation between age and translation potential [29]. With these  
110 estimates of transcript maturity and age at hand, we next studied the role enhancers play in the birth of *de*  
111 *novo* genes and in their integration into regulatory networks.

112

113 *Many young and transcriptionally immature ORFs are proximal to enhancers*

114 H3K27ac and H3K4me1 are histone modifications that are commonly used to identify enhancers,  
115 specifically when they are not found overlapping H3K4me3 modifications, which are indicative of  
116 promoters [38]. We therefore merged chromatin immunoprecipitation followed by DNA sequencing  
117 (ChIP-seq) data for H3K27ac, H3K4me1, and H3K4me3 obtained from 23 mouse tissues and cell types  
118 [39], and considered enhancers to be those genomic regions where H3K27ac and/or H3K4me1 peaks do  
119 not overlap H3K4me3 peaks in any tissue [40, 41] (Materials and Methods). Assessing the 27,347 ORFs  
120 with an assigned maturity level, we found that *i*) mouse-specific ORFs are significantly closer to enhancer  
121 marks than ORFs shared with rat, human, or opossum (Spearman's correlation coefficient  $\rho = 0.27$ ,  $p <$   
122  $0.01$ ), with a median distance to their closest enhancer mark of 1,589bp for mouse-specific ORFs  
123 compared to more than 2,500bp for the remaining age classes (Fig. 3A); *ii*) over 30% of mouse-specific  
124 ORFs are in regions of open chromatin containing enhancer marks, while this percentage decreases as  
125 ORFs grow older to less than 5% for those shared with opossum (Fig. 3B); *iii*) significantly more  
126 enhancers are found within 50kb upstream and 50kb downstream of mouse-specific ORFs than in any  
127 other age class (Fig. S1, Wilcoxon's rank sum test  $p < 0.05$ ); *iv*) the mouse-specific age class has the  
128 highest percentage of ORFs showing evidence of bidirectional transcription – a hallmark of enhancer  
129 activity [42] (Fig. 3C); and *v*) ORFs of lower transcript maturity, which tend to be younger, are nearer to  
130 enhancers than ORFs of higher transcript maturity, which tend to be older (Fig. S2). These results suggest  
131 that the birth of many new genes is facilitated by their close proximity to enhancers.

132 Because many (58%) of the mouse-specific ORFs are found in genomic regions that overlap or are  
133 very close to genomic regions that harbor annotated genes, we expect that at their birth, such ORFs will  
134 inherit the regulatory properties of their host gene, which is older. To specifically assess the regulatory

135 background of ORFs that emerged from or near enhancers and thus did not coopt the regulatory features of  
136 the promoters of older genes, we separated ORFs stemming from genomic regions annotated as intergenic  
137 (which are the ORFs most likely to have emerged *de novo* [29]) from those that we considered genic,  
138 which are those ORFs overlapping other genes or that are near the promoters of other genes (Materials and  
139 Methods). We found that intergenic ORFs are considerably more likely to be found closer to enhancers  
140 than genic ORFs (Fig. 3D; Fig. S3). For example, ~65% of mouse-specific intergenic ORFs were within  
141 1kb of an enhancer, as compared to ~25% for mouse-specific genic ORFs and ~10% for non-mouse-  
142 specific ORFs. This implies that ORFs emerging within intergenic regions of the genome lose their  
143 proximity to enhancers as they age, perhaps via the transformation of enhancers to promoters [43]. This  
144 possibility is supported by the observation that the chromatin modification indicative of promoters,  
145 H3K4me3, shows trends opposite to the ones described above for enhancers. That is, older ORFs are  
146 closer to a larger number of H3K4me3 marks than younger ORFs (Fig. S4).

147 These observations support the hypothesis that enhancers facilitate the *de novo* evolution of genes  
148 from non-coding DNA, and thus contribute to the expansion of gene regulatory networks. However, our  
149 analyses so far have considered enhancer marks that were merged across a diversity of cell types and  
150 tissues. To provide more direct evidence that enhancers facilitate *de novo* gene birth, we separately  
151 considered three tissues (liver, brain, and testis) for which we had both transcriptomic and histone  
152 modification data. We found that 24% (100 ORFs), 36% (931 ORFs), and 26% (244 ORFs) of intergenic  
153 mouse-specific ORFs with evidence for transcription in liver, brain, and testis, respectively, are within 1kb  
154 of an enhancer (Fig. S5). These percentages are considerably lower for genic ORFs (< 8%) and for ORFs  
155 shared with rat, human, and opossum (< 2%). Enhancers therefore provide fertile ground for the *de novo*  
156 birth of new genes from intergenic regions of the genome.

157

### 158 *Enhancer interactions are gradually acquired over macro-evolutionary timescales*

159 We next asked how enhancers integrate new genes into existing regulatory networks. The CCCTC-  
160 binding factor (CTCF) is an architectural DNA-binding protein that mediates physical interactions between  
161 promoters and enhancers [44]. Using ChIP-seq data for CTCF in 15 cell and tissue types, we found that  
162 CTCF-bound regions of the genome overlap a larger fraction of older ORFs than younger ORFs (~75% of  
163 opossum-shared ORFs compared to ~45% of mouse-specific ORFs; Fig. 4A), that there is a negative

164 correlation between the age of an ORF and its distance to the closest CTCF-bound region (Spearman's  
165 correlation coefficient  $\rho = -0.27, p < 0.01$ ), and that among young mouse-specific ORFs the distance to the  
166 closest CTCF peak is significantly higher for intergenic than genic ORFs ( $p < 0.01$ ; Fig. S6). These results  
167 suggest that while young ORFs are proximal to enhancers, they are not specifically targeted by them. Such  
168 enhancer interactions are likely acquired gradually over time, as CTCF motifs, and other sequence changes  
169 conducive to enhancer-promoter interactions, evolve in the proximity of ORFs.

170 To study how ORFs acquire interactions with enhancers, we considered an enhancer-promoter  
171 interaction map derived from single-cell chromatin accessibility data in 13 murine tissues [45] (Materials  
172 and Methods). We first corroborated the negative correlation between an ORF's number of enhancer  
173 interactions and its distance to the closest CTCF-bound region (Spearman's correlation coefficient  $\rho = -$   
174  $0.35, p < 0.01$ ). We then uncovered a positive correlation between the age of an ORF and its number of  
175 enhancer interactions (Spearman's correlation coefficient  $\rho = 0.17, p < 0.01$ ; Fig. 4B). This number  
176 increased from a median of 5 enhancer interactions for mouse-specific ORFs to a median of 13 for ORFs  
177 that are shared with opossum, indicating that enhancer-promoter interactions are gradually acquired over  
178 time. However, when restricting our analysis to ORFs of the highest transcript maturity class, this positive  
179 correlation was lost (Spearman's correlation coefficient  $\rho = 0.001, p = 0.9$ ).

180 We reasoned that this loss could be because mouse-specific ORFs of genic origin are enriched for  
181 transcripts of the highest maturity class (38% as compared to 1.4% for intergenic ORFs). We therefore  
182 partitioned the mouse-specific ORFs according to whether they were intergenic or genic, and compared the  
183 number of enhancer interactions in these classes to the number of enhancer interactions for non-mouse-  
184 specific ORFs. We found that intergenic ORFs had fewer enhancer interactions than genic ORFs, which  
185 were similar to non-mouse-specific ORFs in their number of enhancer interactions (Fig. 4C). This suggests  
186 that mouse-specific ORFs of genic origin, which are enriched for mature transcripts, tend to coopt the  
187 regulatory interactions of their host gene, or of nearby genes. To account for this confounding effect, we  
188 considered ORFs that do not share their segment of open chromatin with any other ORF and are therefore  
189 unlikely to be coopting the enhancer interactions of other genes (Materials and Methods). We call these  
190 'single ORFs'. We use this distinction, rather than intergenic vs. genic, because only 0.06% of ORFs that  
191 emerged before the rat/mouse split are annotated as intergenic, whereas 48% can be considered single  
192 ORFs. After making this distinction, we recovered the positive correlation between an ORF's number of

193 enhancer interactions and its age (Spearman's correlation coefficient  $\rho = 0.24$ ,  $p < 0.01$ ); even for ORFs of  
194 the highest transcript maturity class, we found that mouse-specific ORFs were involved in fewer  
195 interactions than opossum-shared ORFs (Wilcoxon's tailed test,  $p < 0.01$ ; Fig. 4D). Therefore, intergenic  
196 mouse-specific ORFs with the highest level of transcript maturity, which tend to be older than those with  
197 lower levels of transcript maturity (Fig. 2), have fewer interactions than ORFs in the oldest age class,  
198 providing further evidence of the gradual acquisition of enhancer interactions over time.

199 To further explore the pace at which new enhancer interactions are gained over evolutionary time,  
200 we shifted our focus to opossum-shared ORFs, most of which (95%) correspond to annotated genes. We  
201 separated these into 15 new age classes dating back to the origin of cellular life [46] in order to understand  
202 how enhancer interactions are acquired over macroevolutionary timescales (Fig. 5A). With the sole  
203 exception of the oldest genes shared with bacteria and archaea, which have significantly fewer interactions  
204 than ORFs that emerged before the common ancestor of all eukaryotes, no other age class shows  
205 significantly fewer interactions than a younger age class (Fig. 5B; in Fig. S7, note that only a single  
206 element below the main diagonal is significant). Disregarding ORFs from the oldest age class, we found a  
207 significant correlation between the age of genes and their number of enhancer interactions (Spearman's  
208 correlation coefficient  $\rho = 0.15$ ,  $p < 0.01$ ).

209 In sum, young ORFs have relatively few interactions with enhancers, despite being proximal to  
210 them in nucleotide sequence. As ORFs age, they gradually acquire enhancer interactions (Fig. 4), a process  
211 that continues over macroevolutionary timescales (Fig. 5B).

212

### 213 *Enhancer acquisition influences expression breadth and variance*

214 We next explored the functional consequences of enhancer acquisition. To do so, we first studied  
215 the expression breadth of opossum-shared annotated genes using the phylogeny shown in Fig. 5A and  
216 single-cell transcriptomic data from 68 cell types of ten murine tissues [47], for which we also had single-  
217 cell chromatin accessibility data (Materials and Methods). We found that expression breadth increases with  
218 gene age (Spearman's correlation coefficient  $\rho = 0.30$ ,  $p < 0.01$ ; Fig S8A), corroborating previous analyses  
219 performed using transcriptomic data from whole tissues [48]. We additionally found that a gene's  
220 expression breadth increases with its number of enhancer interactions (Spearman's correlation coefficient  
221  $\rho = 0.37$ ,  $p < 0.01$ ; Fig. 5C), suggesting that enhancer acquisition has functional consequences.



222 We next measured the coefficient of variation for the expression of each gene, a measure that is  
223 useful for identifying stably vs. variably expressed genes from single cell RNA sequencing [49]. It is  
224 calculated as the standard deviation of a gene's expression across cell types, divided by the mean  
225 expression across cell types (Materials and Methods). Genes with a lower coefficient of variation tend to  
226 be more tightly regulated than those with a higher coefficient of variation [49]. We found a significant  
227 correlation between the coefficient of variation and gene age (Spearman's correlation coefficient  $\rho = -0.32$ ,  
228  $p < 0.01$ ; Fig. S8B), as well as with a gene's number of enhancer interactions (Spearman's correlation  
229 coefficient  $\rho = -0.32$ ,  $p < 0.01$ ; Fig 5D). Specifically, the coefficient of variation decreases as genes acquire  
230 more enhancer interactions, stabilizing around one when genes acquire at least 20 enhancer interactions.  
231 These results show that enhancer acquisition affects gene expression breadth and variance, further  
232 supporting the role of enhancers in the integration of genes into regulatory networks.

233

## 234 Discussion

235 We report a dual role of enhancers in the evolution of gene regulatory networks: They engage with  
236 the transcriptional machinery to create an environment of open chromatin that is conducive to the *de novo*  
237 birth of new genes, and they help integrate these new genes into existing regulatory networks by  
238 interacting with gene promoters, thus facilitating the evolution of controlled and robust gene expression in  
239 space and time.

240 Our study provides empirical support for the hypothesis that enhancers may facilitate *de novo* gene  
241 evolution, which to our knowledge was first proposed upon the discovery of enhancer RNA [34] and later  
242 expanded upon in a perspective piece by Wu and Sharp [32]. Our findings complement contemporaneous  
243 work [50] on the regulatory architecture of the nematode *Pristionchus pacificus*, which showed that young  
244 genes – those private to *P. pacificus* – are in closer proximity to enhancers than genes with one-to-one  
245 orthologs in other nematode species. The observation that enhancers facilitate *de novo* gene birth in both  
246 nematodes and mammals suggests that this mode of *de novo* gene evolution dates back to at least the  
247 common ancestor of Bilateria, and possibly even earlier, since cnidarians and ctenophores also employ  
248 distal regulatory elements [15, 51, 52].

249 The facilitating role of enhancers in *de novo* gene birth is conceptually similar to the facilitating role  
250 of the permissive chromatin state of meiotic spermatocytes and post-meiotic round spermatids that  
251 underlies the “out-of-testis hypothesis,” which proposes the testis as a primary tissue for the origination of  
252 new genes [17]. Both scenarios envision regions of open chromatin that are exposed to the transcriptional  
253 machinery, and thus produce a transcriptionally active environment that is conducive to the evolution of  
254 new genes. The two scenarios differ, however, in at least two ways. First, genes that emerge from or near  
255 enhancers may rapidly acquire their own promoters, due to the similar architectural and functional features  
256 of enhancers and promoters, a similarity that facilitates the rapid turnover of the former to the latter [43].  
257 Second, enhancers are often deployed in multiple cell types or developmental stages [53], exposing  
258 enhancer-proximal *de novo* genes to distinct cellular contexts where they may confer a selective  
259 advantage.

260 The hypothesis that enhancers help *de novo* genes integrate into existing regulatory networks was  
261 previously proposed in the context of the out-of-testis hypothesis, as a means to expand a new gene’s  
262 breadth of expression [31]. Using single-cell chromatin accessibility and transcriptomic data, our study  
263 provides the first empirical support for the hypothesis that *de novo* genes gradually acquire enhancer  
264 interactions over time, and that this acquisition increases expression breadth. These findings complement  
265 related studies of gene integration into cellular networks, such as networks of protein-protein interactions  
266 [54, 55]. Our observation that genes continue to acquire enhancer interactions over macro-evolutionary  
267 timescales mirrors similar increases in other aspects of gene regulation, such as in the number of proximal  
268 transcription factor binding sites, alternative transcript isoforms, and miRNA targets [56].

269 Regulatory networks drive the spatiotemporal gene expression patterns that give rise to and define the  
270 numerous and distinct cellular identities characteristic of Metazoan life. Enhancers play an integral role in  
271 this process, mediating cell-type-specific gene-gene interactions, thus facilitating the combinatorial  
272 deployment of different genes in different contexts. Genetic changes that affect such interactions are  
273 responsible for myriad evolutionary adaptations and innovations [6-8, 57]. Our results suggest that the  
274 power of enhancers in creating such evolutionary novelties lies not only in their ability to rewire gene  
275 regulatory networks, but also in their ability to expand them, by providing fertile ground for *de novo* gene  
276 birth.

277

## 278 **Materials and methods**

### 279 *ORF age and transcript maturity*

280 Schmitz et al. [29] identified a set of 58,864 ORFs from the transcriptomes of three murine tissues:  
281 liver, testis, and brain. Blasting against the transcriptomes of four other mammalian species (rat, human,  
282 kangaroo rat, and opossum), they estimated the age of each ORF by phylostratigraphic methods [29, 58].  
283 Because of the small number of ORFs shared with the kangaroo rat (49 ORFs), we merged these ORFs  
284 together with those from the rat age class. We used the genomic coordinates of the first exon of each ORF  
285 in the mm10 mouse genome reference to study the regulatory properties of ORFs of different ages, for  
286 example to study their distance to the nearest enhancer.

287 We considered three indicators of ORF transcript maturity:

288 *i) Open chromatin:* We used single-cell ATAC-seq data from 13 different mouse tissues (bone  
289 marrow, cerebellum, large intestine, heart, small intestine, kidney, liver, lung, cortex, spleen, testes,  
290 thymus, and whole brain). The ATAC-seq method detects regions of open chromatin through the  
291 insertion of transposons in random accessible regions of the genome that can later be sequenced [59].  
292 We obtained the data from the Mouse ATAC atlas [45], which comprised 436,206 peaks of open  
293 chromatin. We used liftOver from the Genome Browser at UCSC [60] to convert the genome  
294 coordinates from mm9 to mm10. A total of 29 peaks could not be converted. Using the “intersect”  
295 function of bedtools with default parameters [61], we found which ORFs have their first exons in  
296 regions of open chromatin and are therefore accessible to the transcriptional machinery in at least one  
297 of the tissues.

298 *ii) 5' capping:* We used cap analysis of gene expression (CAGE) data from the FANTOM5  
299 consortium from 1,016 mouse samples including cell lines, primary cells and tissues [62, 63]. This  
300 method is based on the capture of 5' capped ends of mRNA, which allows the mapping of regions of  
301 transcription initiation genome-wide [64]. Using the “closest” function from bedtools with default  
302 parameters [61], we measured the distance between an ORF's first exon and its closest CAGE peak.  
303 We considered a transcript to be 5' capped if the start site of its first exon was located within 200 bases  
304 of a CAGE peak (Fig. S9).

305        *iii) Ribosome association:* We used ribosome profiling (ribo-seq) data from 9 different mouse  
306 tissues (embryonic stem cells, neutrophils, fibroblasts, liver, brain, testis, epidermis, kidney, and  
307 adipose tissue). This method is based on the sequencing of mRNA fragments that are protected from  
308 RNase digestion by ribosomes [65]. We obtained the coordinates of mRNA segments detected by ribo-  
309 seq from GWIPS-viz [66], a database that includes such data from different studies. Following Schmitz  
310 et al. [29], we considered an ORF as being potentially translated if at least one read from the ribo-seq  
311 datasets could be assigned to the ORF in question.

312        Using these indicators, we defined three levels of transcript maturity: maturity level 1 for ORFs  
313 whose first exon overlaps open chromatin, maturity level 2 for ORFs that are also 5' capped, and maturity  
314 level 3 for ORFs that also associate to ribosomes. Because the ribo-seq data may be limited by the  
315 detectability of the transcript [29], we only considered ORFs that were also found in the mRNA-seq  
316 dataset available at GWIPS-viz; this filter lead us to only consider a subset of the ORFs reported by  
317 Schmitz et al. [29]. Specifically, we assigned transcript maturity levels to 46,501 ORFs (~79% of the  
318 58,864 ORFs).

319        To determine if transcript maturity correlates with gene age even within the mouse lineage, we  
320 considered the transcriptomes of brain, liver and testis from 10 different mouse taxa (3 populations of *Mus*  
321 *musculus domesticus*, 2 populations of *M. m. musculus*, and 1 from *M. m. castaneus*, *M. spicilegus*, *M.*  
322 *spretus*, *M. mattheyi* and *Apodemus uralensis*). The data consisted of read counts from the transcriptomes  
323 of each taxon mapped to 200 bp windows of the mm10 mouse reference genome [23]. We considered an  
324 ORF to be expressed in any of the ten taxa if at least 10 reads (the upper threshold to be considered “lowly  
325 expressed” [23]) could be detected in the 200 bp windows overlapping at least 60% of the length of the  
326 first exon of the ORF.

327

### 328 *Enhancer association*

329        We obtained ChIP-seq data for H3K27ac, H3K4me1, and H3K4me3 modifications from 23  
330 different tissues and cell types from the ENCODE project (bone marrow, cerebellum, cortex, heart, kidney,  
331 liver, lung, olfactory bulb, placenta, spleen, small intestine, testis, thymus, embryonic whole brain,  
332 embryonic liver, embryonic limb, brown adipose tissue, macrophages, MEL, MEF, mESC, CH12 cell line,  
333 and E14 embryonic mouse) [39]. We used liftover to convert the genomic coordinates of the peaks from

334 mm9 to mm10. We used the “merge” function of bedtools with default parameters to collate the peaks for  
335 all tissues and cell types, considering any overlapping H3K27ac and H3K4me1 peak as part of the same  
336 enhancer. We used the “intersect” function of bedtools with default parameters to separate H3K27ac and  
337 H3K4me1 peaks that overlapped any length of H3K4me3 peaks from those that did not. This resulted in  
338 172,930 H3K27ac and 277,187 H3K4me1 peaks that did not overlap H3K4me3 peaks. We considered  
339 genomic regions with H3K4me3 peaks to be promoters, and those exclusively with H3K27ac and/or  
340 H3K4me1 peaks to be enhancers [41]. We measured the distance in base pairs between the first exon of an  
341 ORF to an enhancer or promoter using the “closest” function of bedtools with default parameters. To  
342 assess the number of enhancers surrounding an ORF, we considered the 50,000 base pairs upstream and  
343 downstream of the first exon of each ORF, and determined the number of H3K27ac and H3K4me1 peaks  
344 within that window.

345 We also studied the association of ORFs that are expressed in different tissues to chromatin  
346 modifications in those same tissues. To do so, we used the transcriptomic data for brain, testis and liver  
347 from the samples of *Mus musculus domesticus* as described in the previous section to classify ORFs as  
348 expressed or not expressed in each tissue. We determined the fraction of ORFs expressed in each tissue  
349 that were up to 1kb away from a H3K4me1, H3K27ac and H3K4me3 ChIP-seq peak identified from liver,  
350 testis, embryonic whole brain, and cortex samples.

351 We also considered bidirectional CAGE peaks, which are indicative of enhancers [42, 67]. We  
352 assigned bidirectional CAGE peaks to ORFs using the same criteria we used to assign H3K27ac and  
353 H3K4me1 peaks to ORFs, as described above.

354

#### 355 *ORF origin*

356 Schmitz et al. [29] annotated each ORF as belonging to one of 8 different categories: “intergenic,”  
357 “close to promoter same strand,” “close to promoter opposite strand,” “overlapping same strand,”  
358 “overlapping opposite strand,” “overlapping coding sequence same strand,” “overlapping coding sequence  
359 opposite strand,” and “overlapping annotated gene in frame.” We considered all categories except  
360 “intergenic” to be “genic” in order to separate ORFs that are born within or near existing genes from those  
361 that are not. This classification is more challenging for non-mouse-specific ORFs due to the better  
362 annotation of older genes [29], which makes them more likely to correspond to the “overlapping annotated

363 gene in frame” category even if they are of intergenic origin. We therefore further classified ORFs  
364 according to whether they shared their segment of open chromatin with another ORF. Specifically, we  
365 classified an ORF as “shared” if its first exon was in the same segment of open chromatin as the first exon  
366 of any other ORF, and as “single” otherwise.

367

#### 368 *Enhancer interactions*

369 As with H3K27ac, H3K4me1, and H3K4me3 histone modifications, we evaluated the distance of  
370 each ORF to CTCF ChIP-seq peaks obtained from 15 different cell and tissue types (bone marrow,  
371 cerebellum, cortex, heart, kidney, developing limb during stage E14.5, liver, fibroblasts, mESC, olfactory  
372 bulb, small intestine, spleen, testis, thymus and the whole brain) [39]. We used liftOver to convert the data  
373 from mm9 to mm10.

374 Cusanovich et al. [45] used single-cell ATAC-seq data to predict physical interactions between  
375 regions of open chromatin [68], thus creating an atlas of enhancer interactions in single murine cells. We  
376 downloaded these data from the Mouse ATAC atlas [45], which includes the cell clusters where the  
377 interactions occur, as well as the co-accessibility scores of pairs of regions of open chromatin – a measure  
378 of interaction strength. We disregarded cell clusters classified as “unknown” or “collisions”, as well as  
379 interactions with a co-accessibility score lower than 0.25, following Pliner et al. [68]. We also filtered out  
380 interactions with regions of open chromatin that harbored annotated promoters, in order to focus solely on  
381 interactions with enhancers. An interaction was assigned to an ORF if the ORF’s first exon was included in  
382 the interaction.

383

#### 384 *Age of annotated genes*

385 To study how genes acquire enhancer interactions over macro-evolutionary timescales, we  
386 considered the subset of ORFs that belong to the opossum age class in Schmitz et al. [29] and that are  
387 annotated as genes in the latest version of Ensembl (release 95) [69]. We matched these genes to age  
388 estimates reported by Neme & Tautz [46], based on a phylostratigraphic analysis of 20 lineages spanning 4  
389 billion years from the last universal common ancestor to the common ancestor of mouse and rat. We  
390 further filtered the dataset to only include ORFs that emerged in the first 15 of the 20 phylostrata, in order  
391 to focus on ORFs that are considered to have emerged before the split between the common ancestor of

392 placental mammals and marsupials by both Schmitz et al. [29] and Neme & Tautz [46]. This left us with  
393 ~16,000 ORFs corresponding to annotated genes that emerged prior to the origin of placental mammals.

394

#### 395 *Breadth of expression*

396 To study the transcription of annotated genes, we used the expression data reported by the Tabula  
397 Muris Consortium [47] for the single-cell RNA sequencing performed with FACS-based cell capture in  
398 plates, for 20 different mouse tissues. The data include the log-normalization of 1 + counts per million for  
399 each of the annotated genes in each of the sequenced cells. We considered ten tissues that were also used  
400 for the construction of the Mouse ATAC Atlas [45]. We measured the expression breadth of each ORF  
401 corresponding to an annotated gene as the number of cell types in which expression could be detected in at  
402 least 5% of the cells assigned to a cell type. Additionally, we calculated the coefficient of variation of the  
403 expression of each gene as the standard deviation over the mean of the log-normalisation of 1 + counts per  
404 million across cell types.

405

406 **Figures**  
407  
408

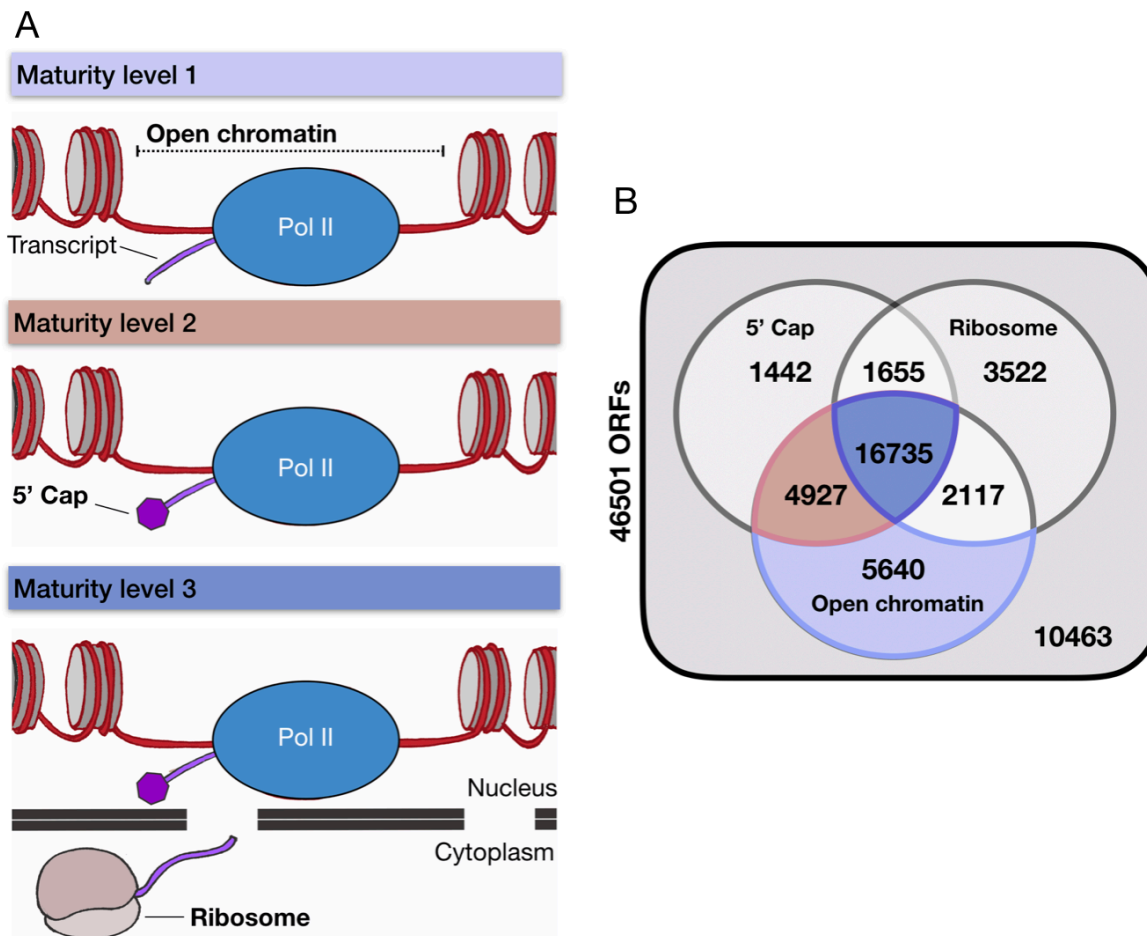

409  
410  
411  
412  
413  
414  
415  
416  
417  
418

Figure 1. Three levels of transcript maturity. A) Maturity level 1 refers to ORFs that are in regions of open chromatin, but have none of the other maturity indicators; ORFs of maturity level 2 are in regions of open chromatin and are 5' capped, but have no evidence of association with ribosomes; ORFs of maturity level 3 are in regions of open chromatin, are 5' capped, and show evidence of association with ribosomes. B) Venn diagram of the number of ORFs associated with each maturity indicator. Colors correspond to the pallet used in A.



419

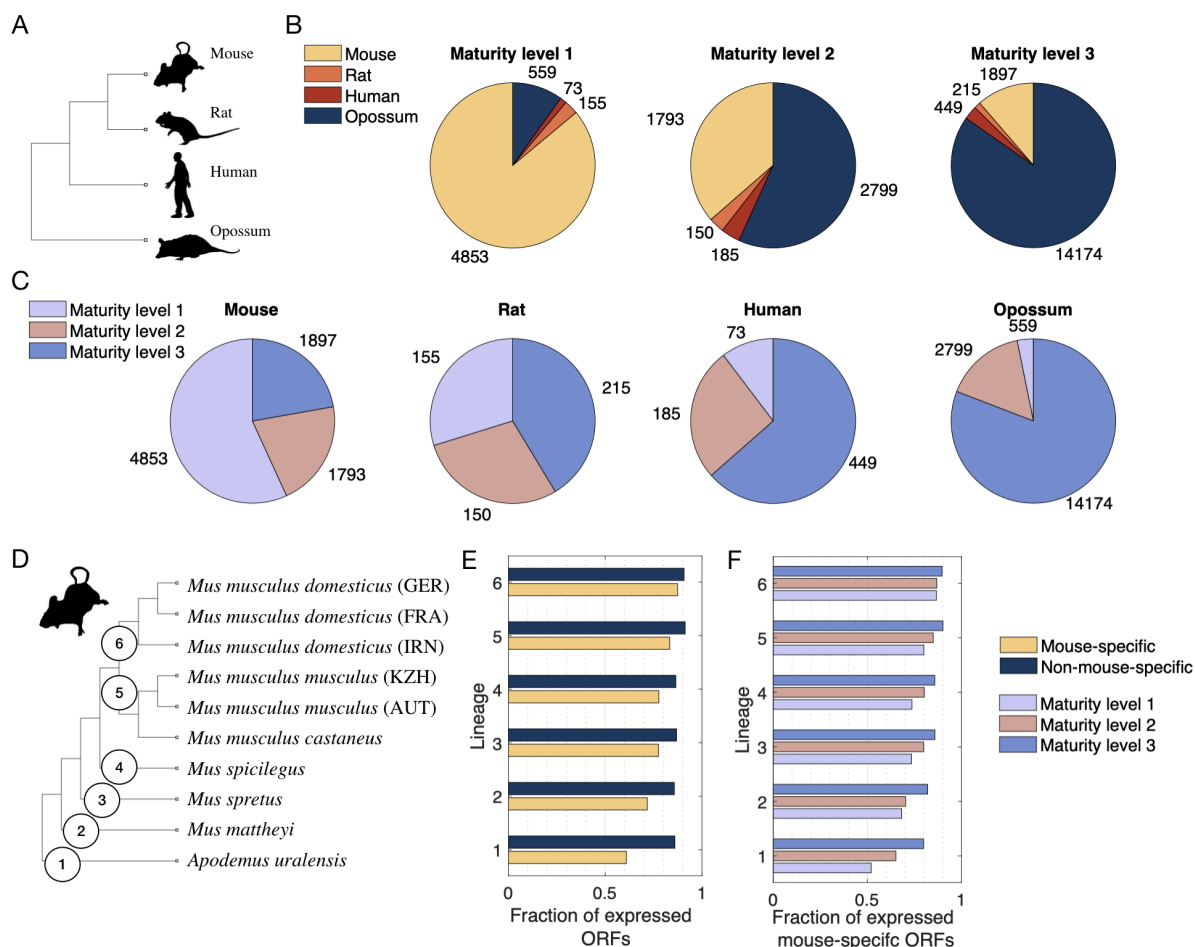

420

421 Figure 2. Transcript maturity level and ORF age. A) Phylogenetic relationship between mouse, rat, human,

422 and opossum – the four species defining each age class. B) Pie charts of the distribution of ORFs from

423 each maturity level among the different age classes. C) Pie charts of the distribution of ORFs from each

424 age class among the different maturity levels. D) Phylogeny adapted from Neme & Tautz [23] of ten

425 mouse taxa used to study the association between the transcription and the maturity level of mouse-

426 specific ORFs. The numbered circles indicate the mouse lineages used for transcriptomic comparisons. E)

427 Fraction of mouse-specific and non-mouse-specific ORFs for which there is evidence of transcription in

428 brain, testis and/or liver in at least one of the taxa included in each of the six mouse lineages. F)

429 Fraction of mouse-specific ORFs of each maturity level with detectable transcription in at least one of the taxa

430 included in each of the six mouse lineages.

431

432

433

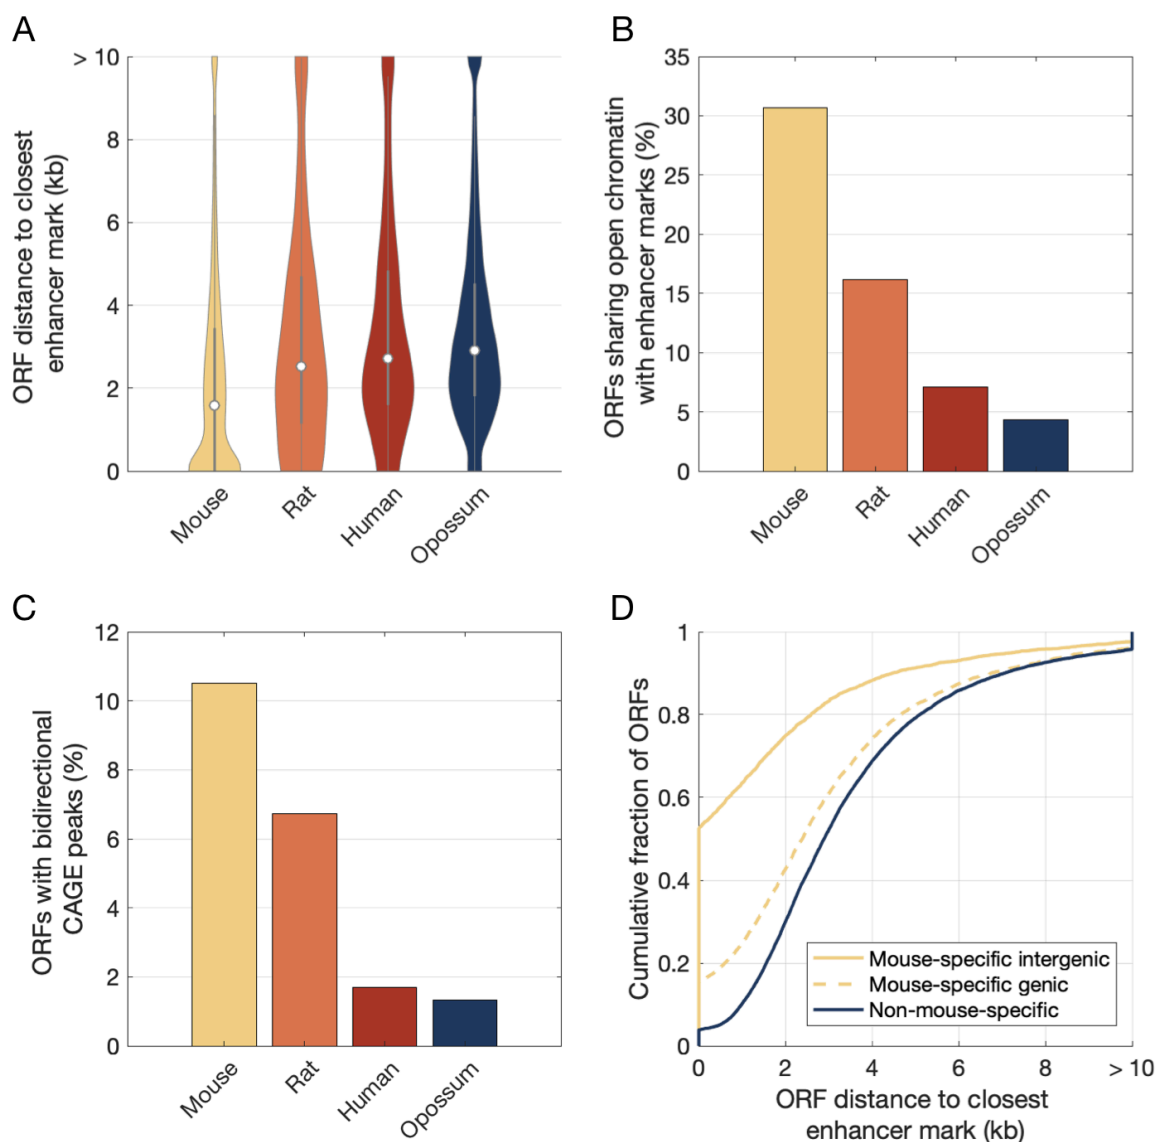

434

435

436

437

438

439

440

441

442

Figure 3. Enhancers facilitate *de novo* gene birth. A) Distance between each ORF and its closest H3K27ac and/or H3K4me1 peak, as a function of ORF age. B) Fraction of ORFs of each age class that share their segment of open chromatin with an enhancer mark. C) Fraction of ORFs from each age class that are within 200bp of a CAGE peak that is annotated as bidirectional [67]. D) Cumulative fraction of mouse-specific ORFs from genic and intergenic regions, as well as non-mouse-specific ORFs, as a function of their proximity to enhancer marks.

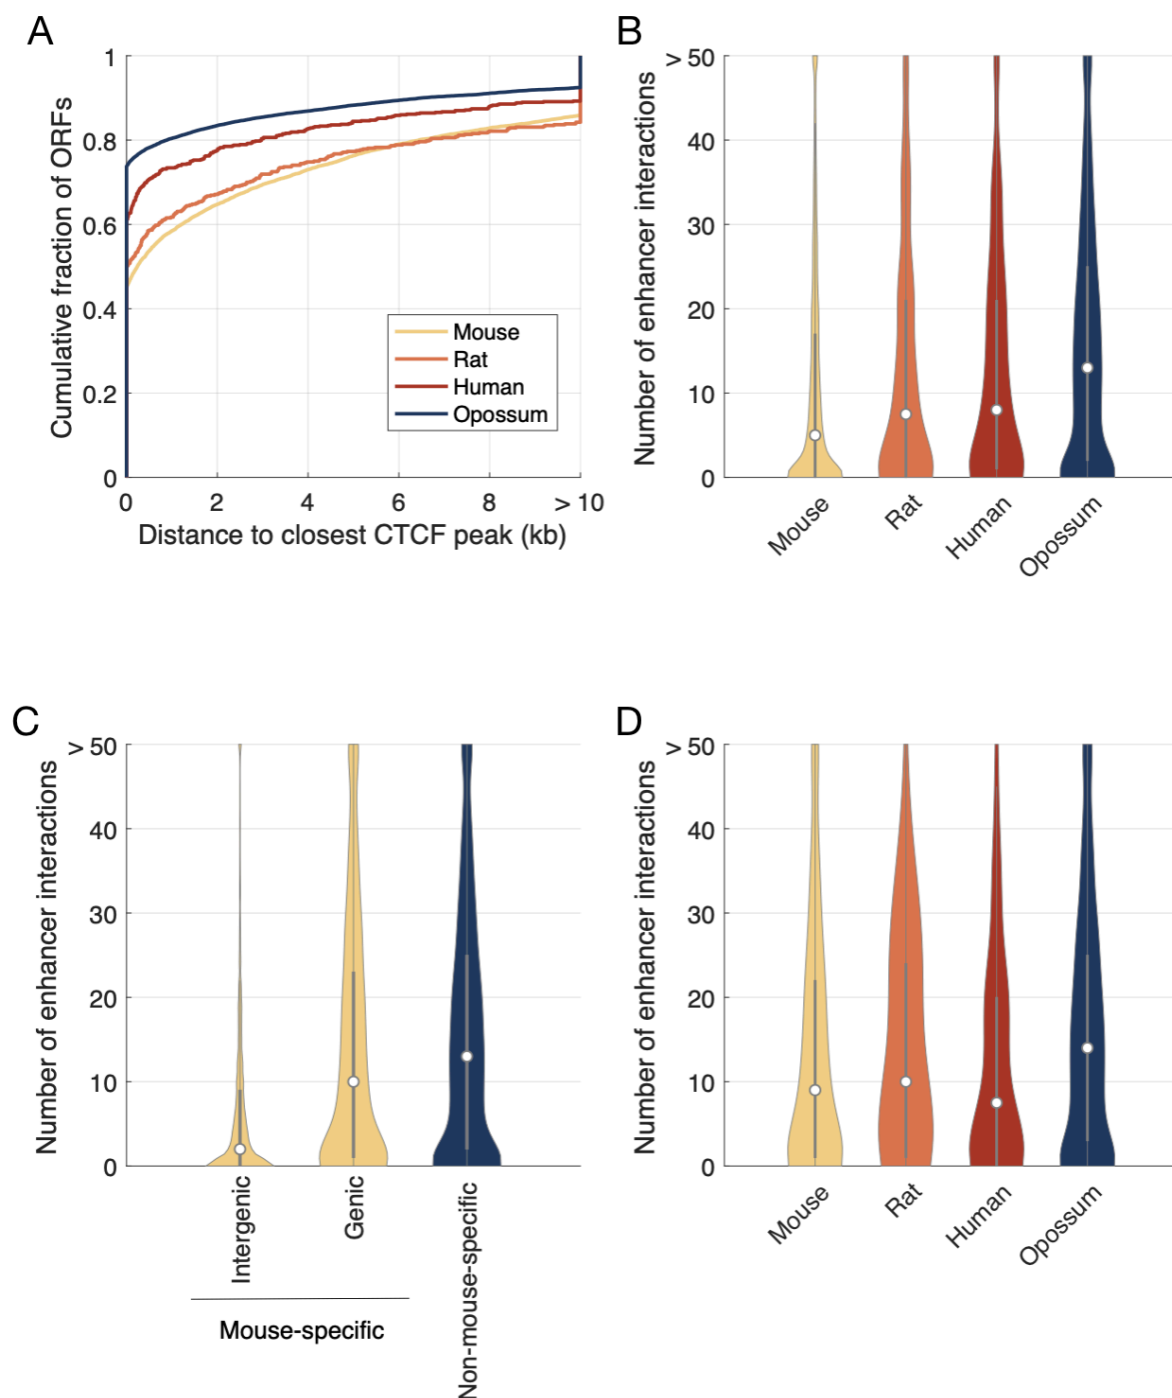

443  
 444 Figure 4. The number of enhancer interactions increases with ORF age. A) Cumulative fraction of ORFs of  
 445 each age class as a function of their distance to the closest CTCF peak. B) Number of enhancer  
 446 interactions of ORFs from each age class. C) Number of enhancer interactions of non-mouse-specific,  
 447 mouse-specific genic, and mouse-specific intergenic ORFs. D) Number of interactions of single ORFs of  
 448 maturity level 3 from each age class.  
 449

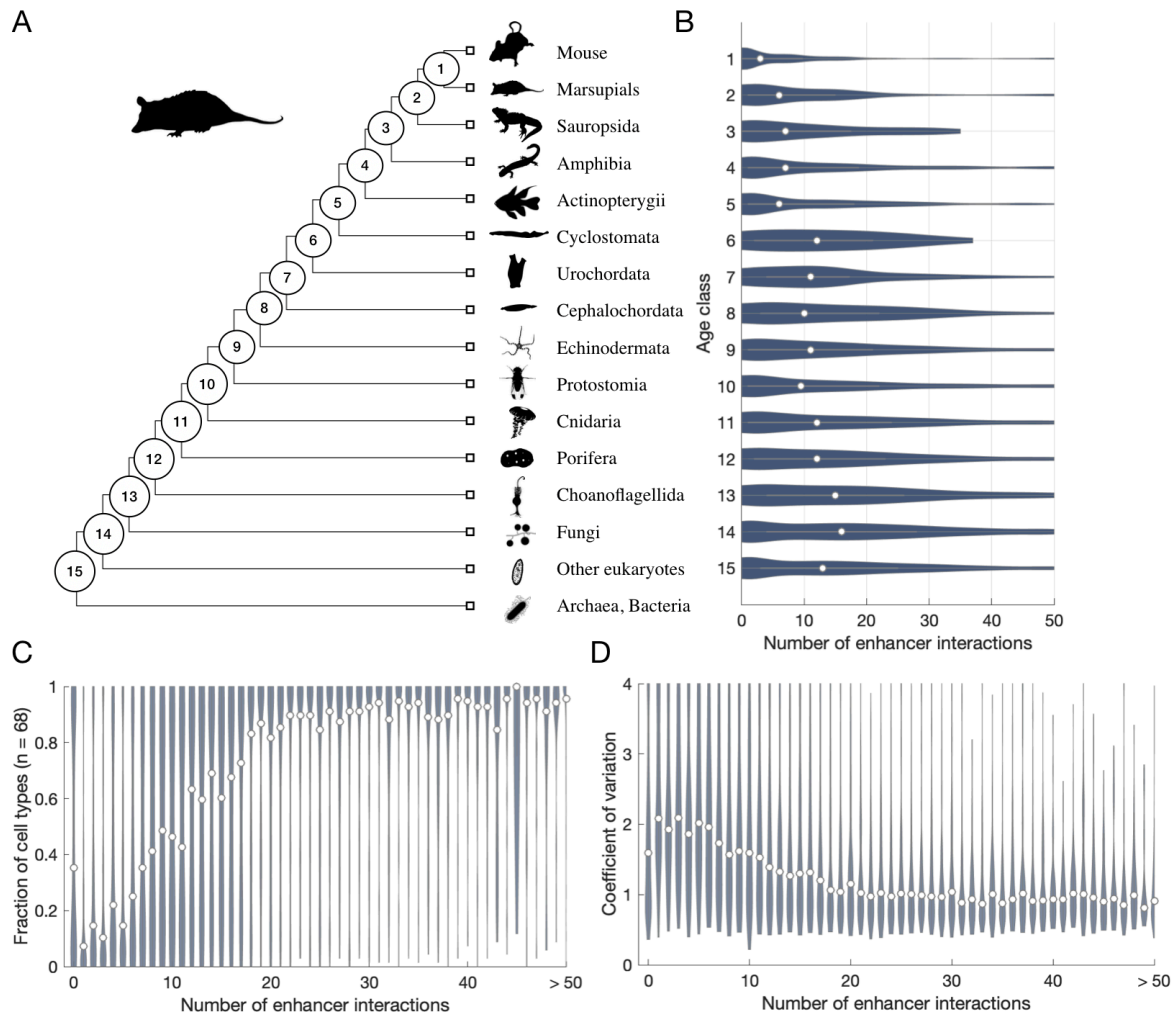

450  
451  
452  
453  
454  
455  
456  
457  
458

Figure 5. Enhancers facilitate the functional integration of genes into regulatory networks across macroevolutionary timescales. A) Phylogeny adapted from [46]. The numbered circles indicate lineages representative of the age classes to which genes were assigned. B) Number of enhancer interactions per gene as a function of gene age. C) Expression breadth and D) coefficient of variation as a function of the number of enhancer interactions.

459 **Supplementary figures**

460

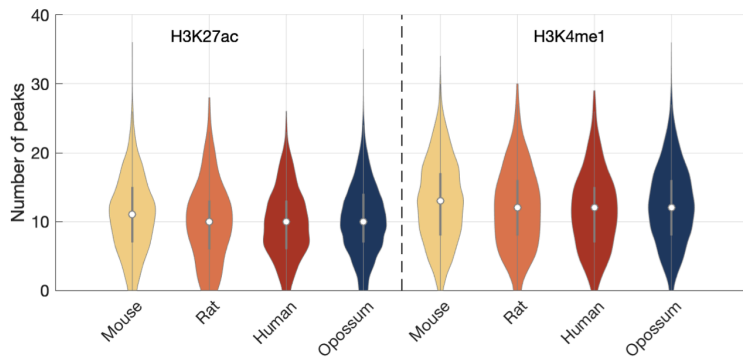

461

462 Figure S1. More enhancers are found near mouse-specific ORFs than are found near older ORFs. The  
463 number of H3K27ac and H3K4me1 peaks flanking ORFs within 50kb upstream and 50kb downstream is  
464 shown as a function of ORF age.

465

466

467

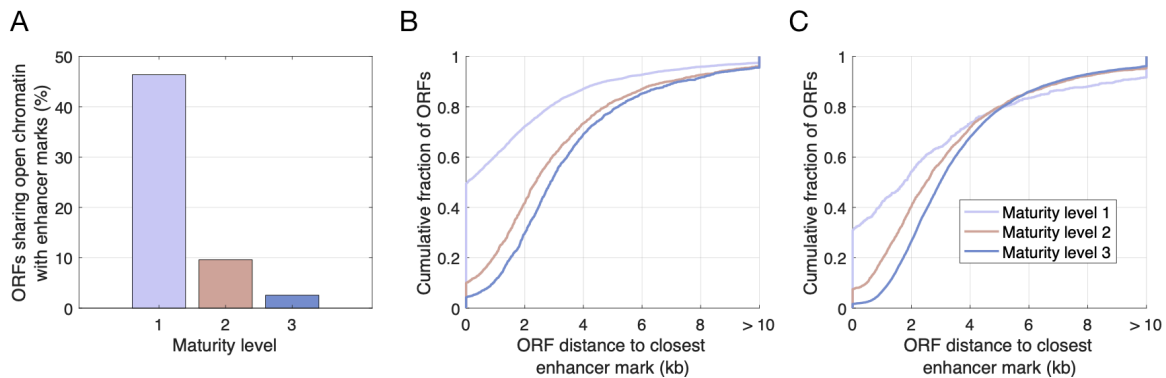

468

469 Figure S2. Distance to enhancers increases with transcript maturity. A) Fraction of ORFs of each maturity  
470 level that share their segment of open chromatin with an H3K27ac and/or H3K4me1 peak. Cumulative  
471 fraction of B) mouse-specific and C) non-mouse specific ORFs classified according to their maturity level,  
472 as a function of their proximity to the closest enhancer mark.

473

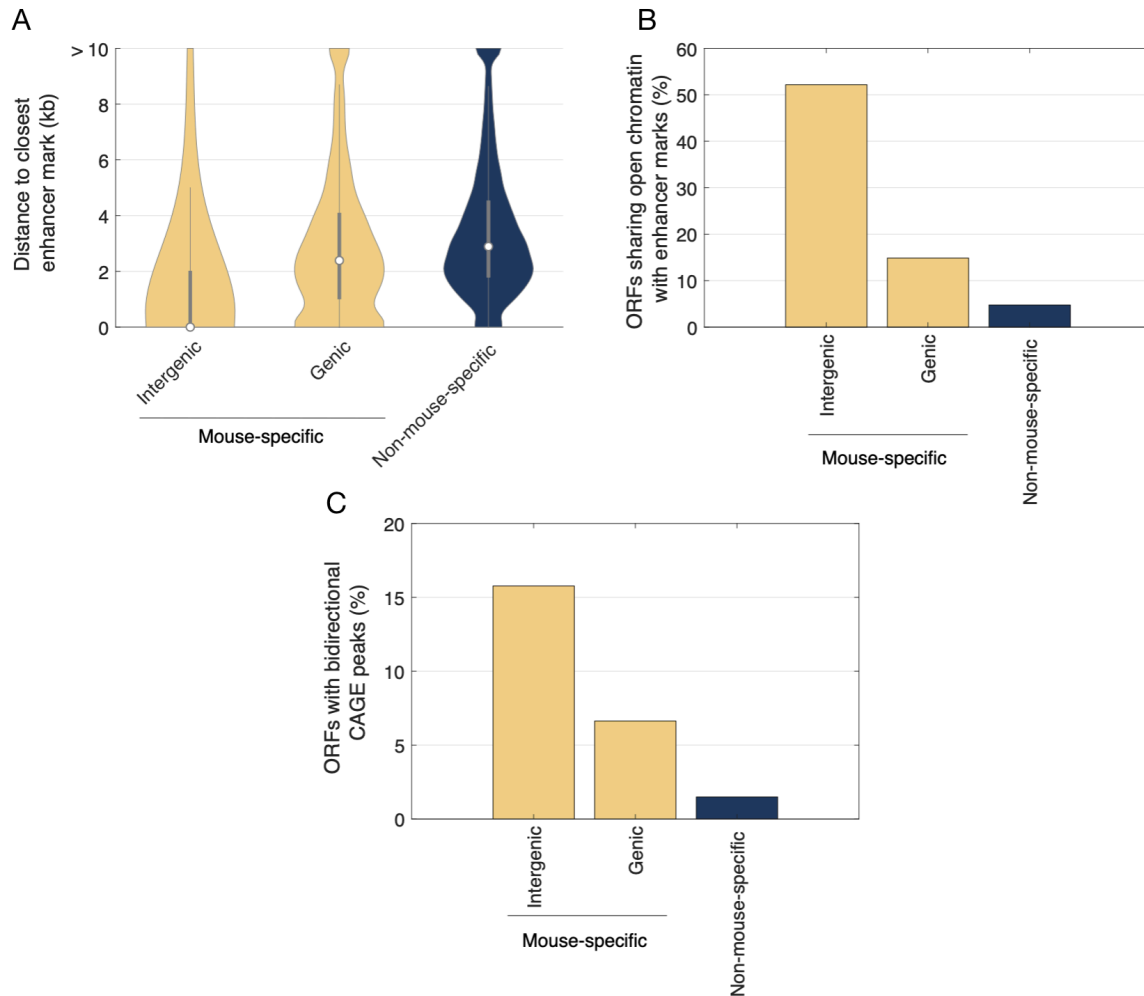

474  
475  
476  
477  
478  
479  
480  
481

Figure S3. Mouse-specific ORFs transcribed from intergenic regions are close to enhancers. A) Distance between each ORF and its closest H3K27ac and/or H3K4me1 peak, as a function of the genomic annotation of each ORF. B) Fraction of intergenic, genic and non-mouse-specific ORFs that share their segment of open chromatin with an enhancer mark. C) Fraction of intergenic, genic and non-mouse-specific ORFs that are within 200bp of a CAGE peak that is annotated as bidirectional [67].

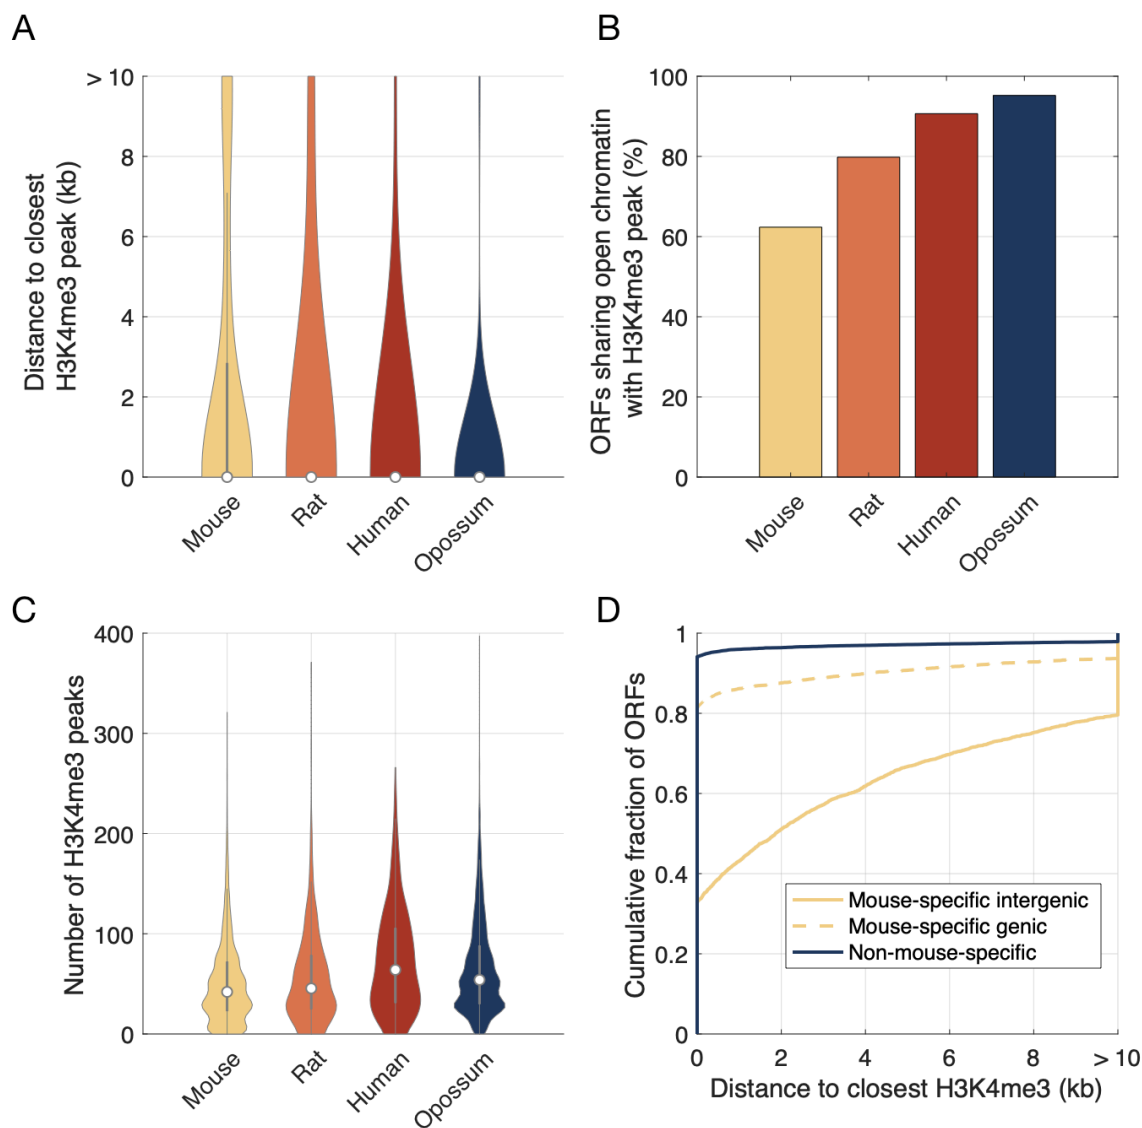

482  
483 Figure S4. Older ORFs are nearer to promoters than younger ORFs. A) Distance between each ORF and  
484 its closest H3K4me3 peak, as a function of ORF age. B) Fraction of ORFs of each age class that share their  
485 segment of open chromatin with an H3K4me3 mark. C) Number of H3K4me3 peaks within 50 kb  
486 upstream or downstream of an ORF, as a function of ORF age. D) Cumulative fraction of mouse-specific  
487 ORFs from genic (dashed yellow line) and intergenic (solid yellow line) genomic regions, as well as non-  
488 mouse-specific ORFs (blue line), as a function of their proximity to H3K4me3 peaks.  
489

490  
491

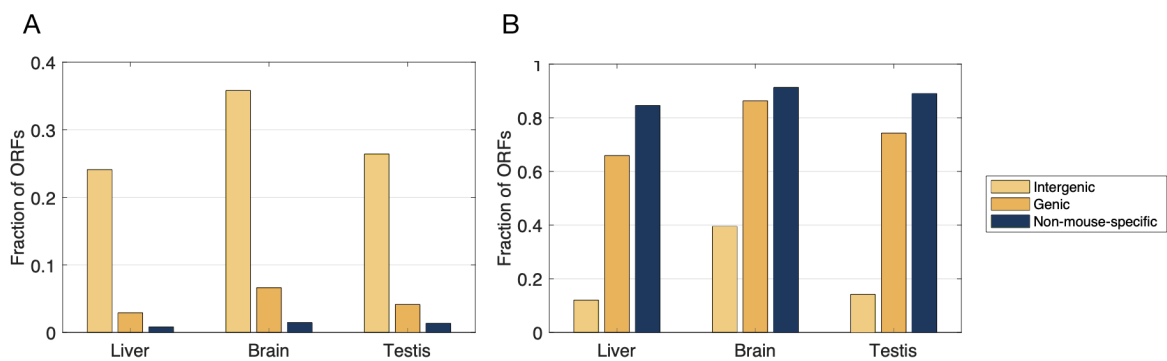

492  
493 Figure S5. Intergenic ORFs preferentially emerge near enhancers. Fraction of ORFs expressed in liver,  
494 brain, and testis that are within 1kb of an active A) enhancer mark (i.e., H3K27ac or H3K4me1) or B)  
495 promoter mark (i.e., H3K4me3) in each tissue.  
496

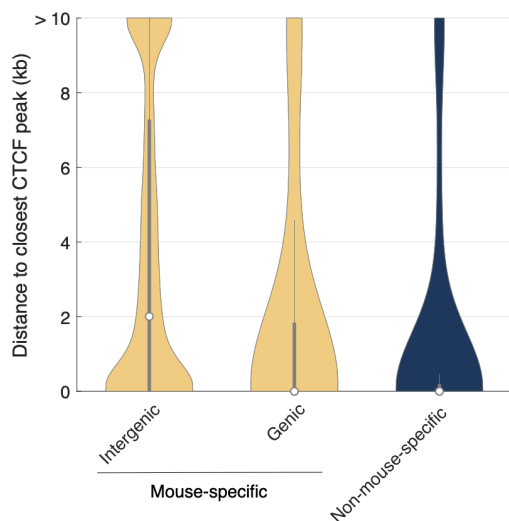

497  
498 Figure S6. Intergenic ORFs are farther away from CTCF-bound regions. Distance between each ORF and  
499 its closest CTCF peak for intergenic, genic and non-mouse-specific ORFs.  
500  
501  
502  
503  
504  
505



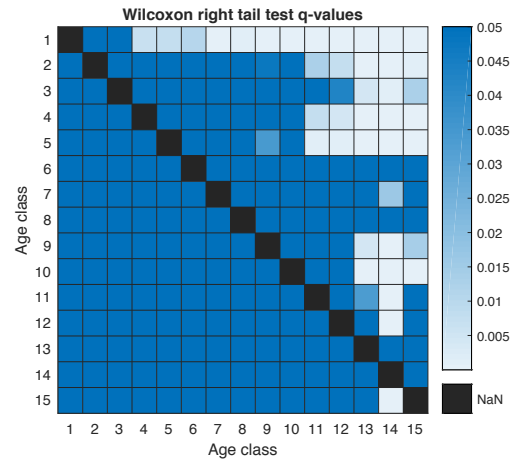

506  
507  
508  
509  
510  
511

Figure S7. Heatmap of FDR-corrected q-values for the Wilcoxon right-tailed test between the number of distal interactions from each pair of age classes. Darker colors indicate higher q-values. All comparisons with a value greater than or equal to 0.05 are the darkest shade and are considered non-significant.

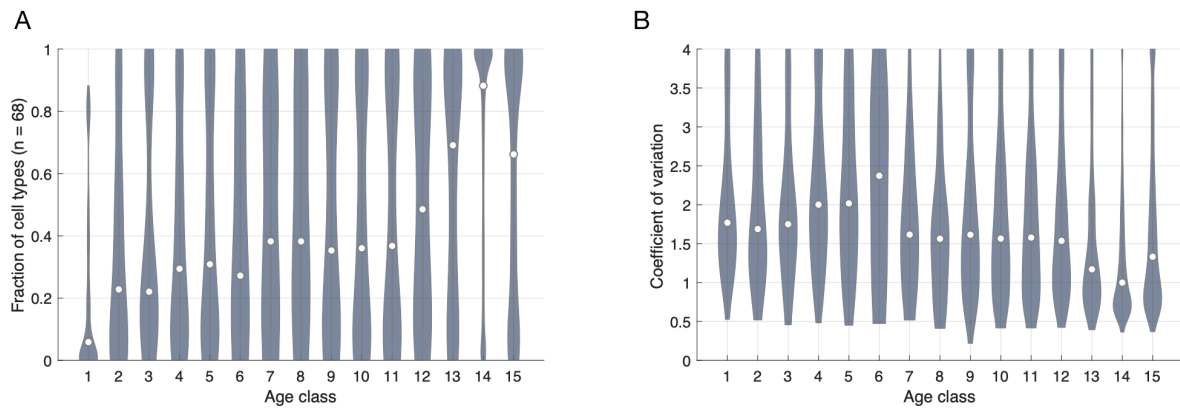

512  
513  
514  
515  
516  
517

Figure S8. Expression breadth and variance correlate with gene age. A) Fraction of cell types in which there is detectable expression of annotated genes (in at least 5% of the cells included in the cell type cluster) as a function of gene age. B) Coefficient of variation of annotated genes as a function of gene age.

518  
519  
520

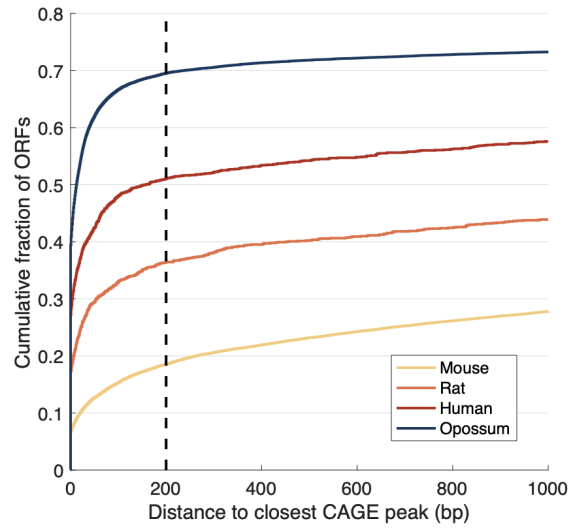

521  
522 Figure S9. Cumulative fraction of ORFs of each age class as a function of the distance to the closest  
523 CAGE peak. The vertical dashed line indicates the threshold we used to consider an ORF as 5' capped  
524 because of its proximity to a CAGE peak.  
525

526  
527

## 528 References

- 529 1. Haberle V, Stark A. Eukaryotic core promoters and the functional basis of  
530 transcription initiation. *Nat Rev Mol Cell Biol.* 2018;19(10):621-37. Epub 2018/06/28. doi:  
531 10.1038/s41580-018-0028-8. PubMed PMID: 29946135; PubMed Central PMCID:  
532 PMC6205604.
- 533 2. Catarino RR, Stark A. Assessing sufficiency and necessity of enhancer activities for  
534 gene expression and the mechanisms of transcription activation. *Genes & Development.*  
535 2018;32(3-4):202-23. doi: 10.1101/gad.310367.117.
- 536 3. Davidson EH, Levine MS. Properties of developmental gene regulatory networks.  
537 *Proc Natl Acad Sci U S A.* 2008;105(51):20063-6. Epub 2008/12/24. doi:  
538 10.1073/pnas.0806007105. PubMed PMID: 19104053; PubMed Central PMCID:  
539 PMC62629280.
- 540 4. Spitz F, Furlong EEM. Transcription factors: from enhancer binding to developmental  
541 control. *Nat Rev Genet.* 2012;13(9):613-26. doi: 10.1038/nrg3207.
- 542 5. Villar D, Berthelot C, Aldridge S, Rayner Tim F, Lukk M, Pignatelli M, et al.  
543 Enhancer Evolution across 20 Mammalian Species. *Cell.* 2015;160(3):554-66. doi:  
544 10.1016/j.cell.2015.01.006.
- 545 6. Prud'homme B, Gompel N, Carroll SB. Emerging principles of regulatory evolution.  
546 *Proceedings of the National Academy of Sciences.* 2007;104(Supplement 1):8605-12. doi:  
547 10.1073/pnas.0700488104.
- 548 7. Carroll SB. Evo-Devo and an Expanding Evolutionary Synthesis: A Genetic Theory  
549 of Morphological Evolution. *Cell.* 2008;134(1):25-36. doi: 10.1016/j.cell.2008.06.030.
- 550 8. Peter Isabelle S, Davidson Eric H. Evolution of Gene Regulatory Networks  
551 Controlling Body Plan Development. *Cell.* 2011;144(6):970-85. doi:  
552 10.1016/j.cell.2011.02.017.
- 553 9. Kherdjemil Y, Lalonde RL, Sheth R, Dumouchel A, de Martino G, Pineault KM, et  
554 al. Evolution of Hoxa11 regulation in vertebrates is linked to the pentadactyl state. *Nature.*  
555 2016;539(7627):89-92. doi: 10.1038/nature19813.
- 556 10. Partha R, Chauhan BK, Ferreira Z, Robinson JD, Lathrop K, Nischal KK, et al.  
557 Subterranean mammals show convergent regression in ocular genes and enhancers, along  
558 with adaptation to tunneling. *eLife.* 2017;6. doi: 10.7554/eLife.25884.
- 559 11. Roscito JG, Sameith K, Parra G, Langer BE, Petzold A, Moebius C, et al. Phenotype  
560 loss is associated with widespread divergence of the gene regulatory landscape in evolution.  
561 *Nature Communications.* 2018;9(1). doi: 10.1038/s41467-018-07122-z.
- 562 12. Kvon EZ, Kamneva OK, Melo US, Barozzi I, Osterwalder M, Mannion BJ, et al.  
563 Progressive Loss of Function in a Limb Enhancer during Snake Evolution. *Cell.*  
564 2016;167(3):633-42.e11. doi: 10.1016/j.cell.2016.09.028.
- 565 13. Kratochwil CF, Liang Y, Gerwin J, Woltering JM, Urban S, Henning F, et al. Agouti-  
566 related peptide 2 facilitates convergent evolution of stripe patterns across cichlid fish  
567 radiations. *Science.* 2018;362(6413):457-60. doi: 10.1126/science.aao6809.
- 568 14. Emera D, Yin J, Reilly SK, Gockley J, Noonan JP. Origin and evolution of  
569 developmental enhancers in the mammalian neocortex. *Proc Natl Acad Sci U S A.*  
570 2016;113(19):E2617-26. Epub 2016/04/27. doi: 10.1073/pnas.1603718113. PubMed PMID:  
571 27114548; PubMed Central PMCID: PMC64868431.
- 572 15. Sebe-Pedros A, Chomsky E, Pang K, Lara-Astiaso D, Gaiti F, Mukamel Z, et al.  
573 Early metazoan cell type diversity and the evolution of multicellular gene regulation. *Nat*  
574 *Ecol Evol.* 2018;2(7):1176-88. Epub 2018/06/27. doi: 10.1038/s41559-018-0575-6. PubMed  
575 PMID: 29942020; PubMed Central PMCID: PMC6040636.

- 576 16. Teichmann SA, Babu MM. Gene regulatory network growth by duplication. *Nature*  
577 *Genetics*. 2004;36(5):492-6. doi: 10.1038/ng1340.
- 578 17. Kaessmann H. Origins, evolution, and phenotypic impact of new genes. *Genome Res*.  
579 2010;20(10):1313-26. Epub 2010/07/24. doi: 10.1101/gr.101386.109. PubMed PMID:  
580 20651121; PubMed Central PMCID: PMCPMC2945180.
- 581 18. McLysaght A, Hurst LD. Open questions in the study of de novo genes: what, how  
582 and why. *Nat Rev Genet*. 2016;17(9):567-78. doi: 10.1038/nrg.2016.78. PubMed PMID:  
583 WOS:000381510700013.
- 584 19. Xie C, Bekpen C, Künzel S, Keshavarz M, Krebs-Wheaton R, Skrabar N, et al. 2019.  
585 doi: 10.1101/510214.
- 586 20. Betran E, Reinhardt JA, Wanjiru BM, Brant AT, Saelao P, Begun DJ, et al. De Novo  
587 ORFs in Drosophila Are Important to Organismal Fitness and Evolved Rapidly from  
588 Previously Non-coding Sequences. *PLoS Genetics*. 2013;9(10). doi:  
589 10.1371/journal.pgen.1003860.
- 590 21. Kim SK, Mayer MG, Rödelberger C, Witte H, Riebesell M, Sommer RJ. The Orphan  
591 Gene dauerless Regulates Dauer Development and Intraspecific Competition in Nematodes  
592 by Copy Number Variation. *PLOS Genetics*. 2015;11(6). doi: 10.1371/journal.pgen.1005146.
- 593 22. Li D, Yan Z, Lu L, Jiang H, Wang W. Pleiotropy of the de novo-originated gene  
594 MDF1. *Scientific Reports*. 2014;4(1). doi: 10.1038/srep07280.
- 595 23. Neme R, Tautz D. Fast turnover of genome transcription across evolutionary time  
596 exposes entire non-coding DNA to de novo gene emergence. *eLife*. 2016;5. doi:  
597 10.7554/eLife.09977.
- 598 24. Kapranov P, Willingham AT, Gingeras TR. Genome-wide transcription and the  
599 implications for genomic organization. *Nat Rev Genet*. 2007;8(6):413-23. doi:  
600 10.1038/nrg2083.
- 601 25. Ruiz-Orera J, Verdaguer-Grau P, Villanueva-Canas JL, Messeguer X, Alba MM.  
602 Translation of neutrally evolving peptides provides a basis for de novo gene evolution. *Nat*  
603 *Ecol Evol*. 2018;2(5):890-6. Epub 2018/03/21. doi: 10.1038/s41559-018-0506-6. PubMed  
604 PMID: 29556078.
- 605 26. Ingolia Nicholas T, Brar Gloria A, Stern-Ginossar N, Harris Michael S, Talhouarne  
606 Gaëlle JS, Jackson Sarah E, et al. Ribosome Profiling Reveals Pervasive Translation Outside  
607 of Annotated Protein-Coding Genes. *Cell Reports*. 2014;8(5):1365-79. doi:  
608 10.1016/j.celrep.2014.07.045.
- 609 27. Prabh N, Rödelberger C. Are orphan genes protein-coding, prediction artifacts, or  
610 non-coding RNAs? *BMC Bioinformatics*. 2016;17(1). doi: 10.1186/s12859-016-1102-x.
- 611 28. Zhang L, Ren Y, Yang T, Li G, Chen J, Gschwend AR, et al. Rapid evolution of  
612 protein diversity by de novo origination in *Oryza*. *Nature Ecology & Evolution*.  
613 2019;3(4):679-90. doi: 10.1038/s41559-019-0822-5.
- 614 29. Schmitz JF, Ullrich KK, Bornberg-Bauer E. Incipient de novo genes can evolve from  
615 frozen accidents that escaped rapid transcript turnover. *Nat Ecol Evol*. 2018;2(10):1626-32.  
616 Epub 2018/09/12. doi: 10.1038/s41559-018-0639-7. PubMed PMID: 30201962.
- 617 30. Ruiz-Orera J, Alba MM. Translation of Small Open Reading Frames: Roles in  
618 Regulation and Evolutionary Innovation. *Trends Genet*. 2019;35(3):186-98. Epub  
619 2019/01/05. doi: 10.1016/j.tig.2018.12.003. PubMed PMID: 30606460.
- 620 31. Tautz D, Domazet-Loso T. The evolutionary origin of orphan genes. *Nat Rev Genet*.  
621 2011;12(10):692-702. Epub 2011/09/01. doi: 10.1038/nrg3053. PubMed PMID: 21878963.
- 622 32. Wu X, Sharp Phillip A. Divergent Transcription: A Driving Force for New Gene  
623 Origination? *Cell*. 2013;155(5):990-6. doi: 10.1016/j.cell.2013.10.048.

- 624 33. Levine M, Cattoglio C, Tjian R. Looping back to leap forward: transcription enters a  
625 new era. *Cell*. 2014;157(1):13-25. Epub 2014/04/01. doi: 10.1016/j.cell.2014.02.009.  
626 PubMed PMID: 24679523; PubMed Central PMCID: PMC4059561.
- 627 34. Kim T-K, Hemberg M, Gray JM, Costa AM, Bear DM, Wu J, et al. Widespread  
628 transcription at neuronal activity-regulated enhancers. *Nature*. 2010;465(7295):182-7. doi:  
629 10.1038/nature09033.
- 630 35. Evdokimova V, Ruzanov P, Imataka H, Raught B, Svitkin Y, Ovchinnikov LP, et al.  
631 The major mRNA-associated protein YB-1 is a potent 5' cap-dependent mRNA stabilizer.  
632 *EMBO J*. 2001;20(19):5491-502. Epub 2001/09/28. doi: 10.1093/emboj/20.19.5491. PubMed  
633 PMID: 11574481; PubMed Central PMCID: PMC125650.
- 634 36. Shatkin A. Capping of eucaryotic mRNAs. *Cell*. 1976;9(4):645-53. doi:  
635 10.1016/0092-8674(76)90128-8.
- 636 37. Visa N, Izaurralde E, Ferreira J, Daneholt B, Mattaj IW. A nuclear cap-binding  
637 complex binds Balbiani ring pre-mRNA cotranscriptionally and accompanies the  
638 ribonucleoprotein particle during nuclear export. *J Cell Biol*. 1996;133(1):5-14. Epub  
639 1996/04/01. PubMed PMID: 8601613; PubMed Central PMCID: PMC2120770.
- 640 38. Heintzman ND, Stuart RK, Hon G, Fu Y, Ching CW, Hawkins RD, et al. Distinct and  
641 predictive chromatin signatures of transcriptional promoters and enhancers in the human  
642 genome. *Nat Genet*. 2007;39(3):311-8. Epub 2007/02/06. doi: 10.1038/ng1966. PubMed  
643 PMID: 17277777.
- 644 39. An integrated encyclopedia of DNA elements in the human genome. *Nature*.  
645 2012;489(7414):57-74. doi: 10.1038/nature11247.
- 646 40. Creighton MP, Cheng AW, Welstead GG, Kooistra T, Carey BW, Steine EJ, et al.  
647 Histone H3K27ac separates active from poised enhancers and predicts developmental state.  
648 *Proceedings of the National Academy of Sciences*. 2010;107(50):21931-6. doi:  
649 10.1073/pnas.1016071107.
- 650 41. Berthelot C, Villar D, Horvath JE, Odom DT, Flicek P. Complexity and conservation  
651 of regulatory landscapes underlie evolutionary resilience of mammalian gene expression. *Nat*  
652 *Ecol Evol*. 2018;2(1):152-63. Epub 2017/11/29. doi: 10.1038/s41559-017-0377-2. PubMed  
653 PMID: 29180706; PubMed Central PMCID: PMC5733139.
- 654 42. Andersson R, Gebhard C, Miguel-Escalada I, Hoof I, Bornholdt J, Boyd M, et al. An  
655 atlas of active enhancers across human cell types and tissues. *Nature*. 2014;507(7493):455-  
656 61. doi: 10.1038/nature12787.
- 657 43. Carelli FN, Liechti A, Halbert J, Warnefors M, Kaessmann H. Repurposing of  
658 promoters and enhancers during mammalian evolution. *Nat Commun*. 2018;9(1):4066. Epub  
659 2018/10/06. doi: 10.1038/s41467-018-06544-z. PubMed PMID: 30287902; PubMed Central  
660 PMCID: PMC6172195.
- 661 44. Ong C-T, Corces VG. CTCF: an architectural protein bridging genome topology and  
662 function. *Nat Rev Genet*. 2014;15(4):234-46. doi: 10.1038/nrg3663.
- 663 45. Cusanovich DA, Hill AJ, Aghamirzaie D, Daza RM, Pliner HA, Berletch JB, et al. A  
664 Single-Cell Atlas of In Vivo Mammalian Chromatin Accessibility. *Cell*. 2018;174(5):1309-  
665 24 e18. Epub 2018/08/07. doi: 10.1016/j.cell.2018.06.052. PubMed PMID: 30078704;  
666 PubMed Central PMCID: PMC6158300.
- 667 46. Neme R, Tautz D. Phylogenetic patterns of emergence of new genes support a model  
668 of frequent de novo evolution. *BMC Genomics*. 2013;14(1). doi: 10.1186/1471-2164-14-117.
- 669 47. Tabula Muris C, Overall c, Logistical c, Organ c, processing, Library p, et al. Single-  
670 cell transcriptomics of 20 mouse organs creates a Tabula Muris. *Nature*.  
671 2018;562(7727):367-72. Epub 2018/10/05. doi: 10.1038/s41586-018-0590-4. PubMed  
672 PMID: 30283141.

- 673 48. Kryuchkova-Mostacci N, Robinson-Rechavi M. Tissue-Specific Evolution of Protein  
674 Coding Genes in Human and Mouse. *PLoS One*. 2015;10(6):e0131673. Epub 2015/06/30.  
675 doi: 10.1371/journal.pone.0131673. PubMed PMID: 26121354; PubMed Central PMCID:  
676 PMCPMC4488272.
- 677 49. Mantsoki A, Devailly G, Joshi A. Gene expression variability in mammalian  
678 embryonic stem cells using single cell RNA-seq data. *Computational Biology and Chemistry*.  
679 2016;63:52-61. doi: 10.1016/j.compbiolchem.2016.02.004.
- 680 50. Werner MS, Sieriebriennikov B, Prabh N, Loschko T, Lanz C, Sommer RJ. Young  
681 genes have distinct gene structure, epigenetic profiles, and transcriptional regulation. *Genome*  
682 *Research*. 2018;28(11):1675-87. doi: 10.1101/gr.234872.118.
- 683 51. Sebe-Pedros A, Saudemont B, Chomsky E, Plessier F, Mailhe MP, Renno J, et al.  
684 Cnidarian Cell Type Diversity and Regulation Revealed by Whole-Organism Single-Cell  
685 RNA-Seq. *Cell*. 2018;173(6):1520-34 e20. Epub 2018/06/02. doi: 10.1016/j.cell.2018.05.019.  
686 PubMed PMID: 29856957.
- 687 52. Schwaiger M, Schonauer A, Rendeiro AF, Pribitzer C, Schauer A, Gilles AF, et al.  
688 Evolutionary conservation of the eumetazoan gene regulatory landscape. *Genome Research*.  
689 2014;24(4):639-50. doi: 10.1101/gr.162529.113.
- 690 53. Kvon EZ, Kazmar T, Stampfel G, Yáñez-Cuna JO, Pagani M, Schernhuber K, et al.  
691 Genome-scale functional characterization of *Drosophila* developmental enhancers in vivo.  
692 *Nature*. 2014;512(7512):91-5. doi: 10.1038/nature13395.
- 693 54. Capra JA, Pollard KS, Singh M. Novel genes exhibit distinct patterns of function  
694 acquisition and network integration. *Genome Biol*. 2010;11(12):R127. Epub 2010/12/29. doi:  
695 10.1186/gb-2010-11-12-r127. PubMed PMID: 21187012; PubMed Central PMCID:  
696 PMCPMC3046487.
- 697 55. Abrusán G. Integration of New Genes into Cellular Networks, and Their Structural  
698 Maturation. *Genetics*. 2013;195(4):1407-17. doi: 10.1534/genetics.113.152256.
- 699 56. Warnefors M, Eyre-Walker A. The Accumulation of Gene Regulation Through Time.  
700 *Genome Biology and Evolution*. 2011;3:667-73. doi: 10.1093/gbe/evr019.
- 701 57. Carroll SB. Chance and necessity: the evolution of morphological complexity and  
702 diversity. *Nature*. 2001;409(6823):1102-9. Epub 2001/03/10. doi: 10.1038/35059227.  
703 PubMed PMID: 11234024.
- 704 58. Domazet-Lošo T, Brajković J, Tautz D. A phylostratigraphy approach to uncover the  
705 genomic history of major adaptations in metazoan lineages. *Trends in Genetics*.  
706 2007;23(11):533-9. doi: 10.1016/j.tig.2007.08.014.
- 707 59. Buenrostro JD, Giresi PG, Zaba LC, Chang HY, Greenleaf WJ. Transposition of  
708 native chromatin for fast and sensitive epigenomic profiling of open chromatin, DNA-  
709 binding proteins and nucleosome position. *Nature Methods*. 2013;10(12):1213-8. doi:  
710 10.1038/nmeth.2688.
- 711 60. Kent WJ, Sugnet CW, Furey TS, Roskin KM, Pringle TH, Zahler AM, et al. The  
712 Human Genome Browser at UCSC. *Genome Research*. 2002;12(6):996-1006. doi:  
713 10.1101/gr.229102.
- 714 61. Quinlan AR, Hall IM. BEDTools: a flexible suite of utilities for comparing genomic  
715 features. *Bioinformatics*. 2010;26(6):841-2. doi: 10.1093/bioinformatics/btq033.
- 716 62. Lizio M, Harshbarger J, Shimoji H, Severin J, Kasukawa T, Sahin S, et al. Gateways  
717 to the FANTOM5 promoter level mammalian expression atlas. *Genome Biology*. 2015;16(1).  
718 doi: 10.1186/s13059-014-0560-6.
- 719 63. Noguchi S, Arakawa T, Fukuda S, Furuno M, Hasegawa A, Hori F, et al. FANTOM5  
720 CAGE profiles of human and mouse samples. *Scientific Data*. 2017;4. doi:  
721 10.1038/sdata.2017.112.

- 722 64. Shiraki T, Kondo S, Katayama S, Waki K, Kasukawa T, Kawaji H, et al. Cap analysis  
723 gene expression for high-throughput analysis of transcriptional starting point and  
724 identification of promoter usage. *Proceedings of the National Academy of Sciences*.  
725 2003;100(26):15776-81. doi: 10.1073/pnas.2136655100.
- 726 65. Ingolia NT. Ribosome profiling: new views of translation, from single codons to  
727 genome scale. *Nat Rev Genet*. 2014;15(3):205-13. doi: 10.1038/nrg3645.
- 728 66. Michel AM, Fox G, M. Kiran A, De Bo C, O'Connor PBF, Heaphy SM, et al.  
729 GWIPS-viz: development of a ribo-seq genome browser. *Nucleic Acids Research*.  
730 2014;42(D1):D859-D64. doi: 10.1093/nar/gkt1035.
- 731 67. Dalby M, Rennie, Sarah, & Andersson, Robin. FANTOM5 transcribed enhancers in  
732 mm10 Zenodo2018.
- 733 68. Pliner HA, Packer JS, McFaline-Figueroa JL, Cusanovich DA, Daza RM,  
734 Aghamirzaie D, et al. Cicero Predicts cis-Regulatory DNA Interactions from Single-Cell  
735 Chromatin Accessibility Data. *Molecular Cell*. 2018;71(5):858-71.e8. doi:  
736 10.1016/j.molcel.2018.06.044.
- 737 69. Cunningham F, Achuthan P, Akanni W, Allen J, Amode MR, Armean IM, et al.  
738 Ensembl 2019. *Nucleic Acids Res*. 2019;47(D1):D745-D51. Epub 2018/11/09. doi:  
739 10.1093/nar/gky1113. PubMed PMID: 30407521; PubMed Central PMCID:  
740 PMC6323964.  
741
